# Supplementary material for: Intra-Arterial Chemotherapy (Ophthalmic Artery Chemosurgery) for Group D Retinoblastoma
Source: PLoS One. 2016 Jan 12;11(1):e0146582. doi: 10.1371/journal.pone.0146582 (PMC4710506; doi:10.1371/journal.pone.0146582)
Supplement: S1 Table — (PDF) [file pone.0146582.s001.pdf]

[illegible]

**S1 Supplementary Table. Complete de-identified data set used for analyses.**
